# Supplementary material for: MicroRNA-33a negatively regulates myoblast proliferation by targeting IGF1, follistatin and cyclin D1
Source: Oxford University Press journal article supplement (doi:10.1042/bsr20191327), 2020-05-21
Supplement: bsr-2019-1327_supp.pdf [file bsr-2019-1327_supp.pdf]

**Supplemental Figure 1**

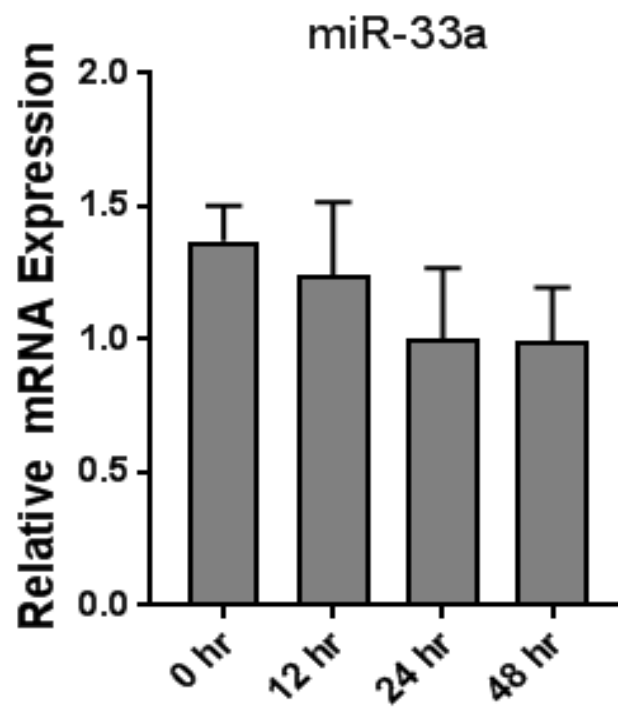

Figure S1. Quantitative RT-PCR analysis of miR-33a expression in myoblasts in 0 hr, 12 hrs, 24 hrs and 48 hrs

**Supplemental Figure 2**

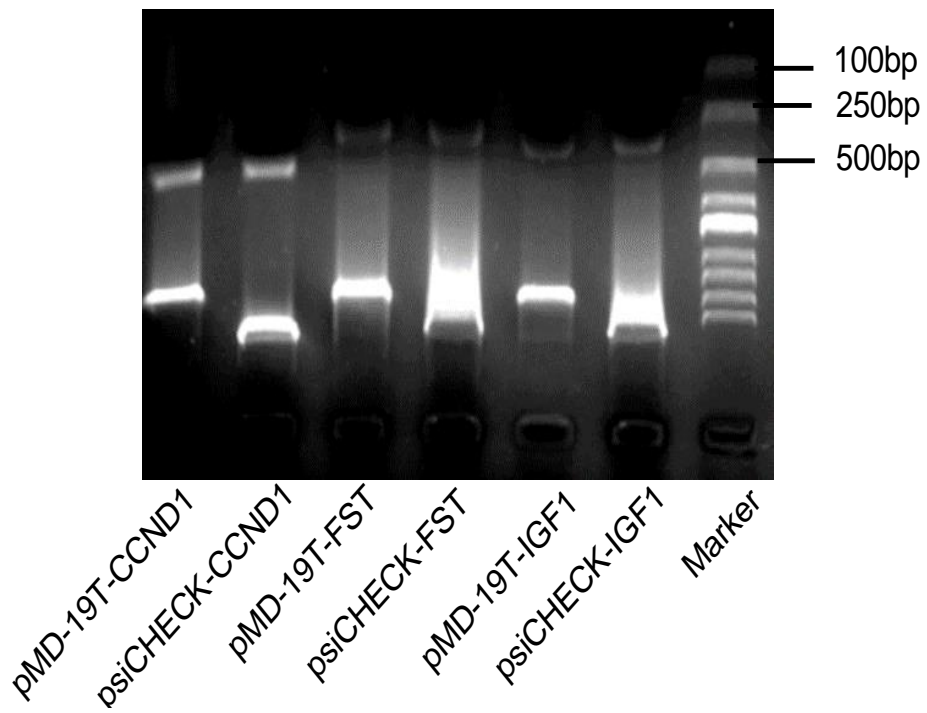

Figure S2. Identification of recombinant plasmids by double digestion

### Supplemental Figure 3

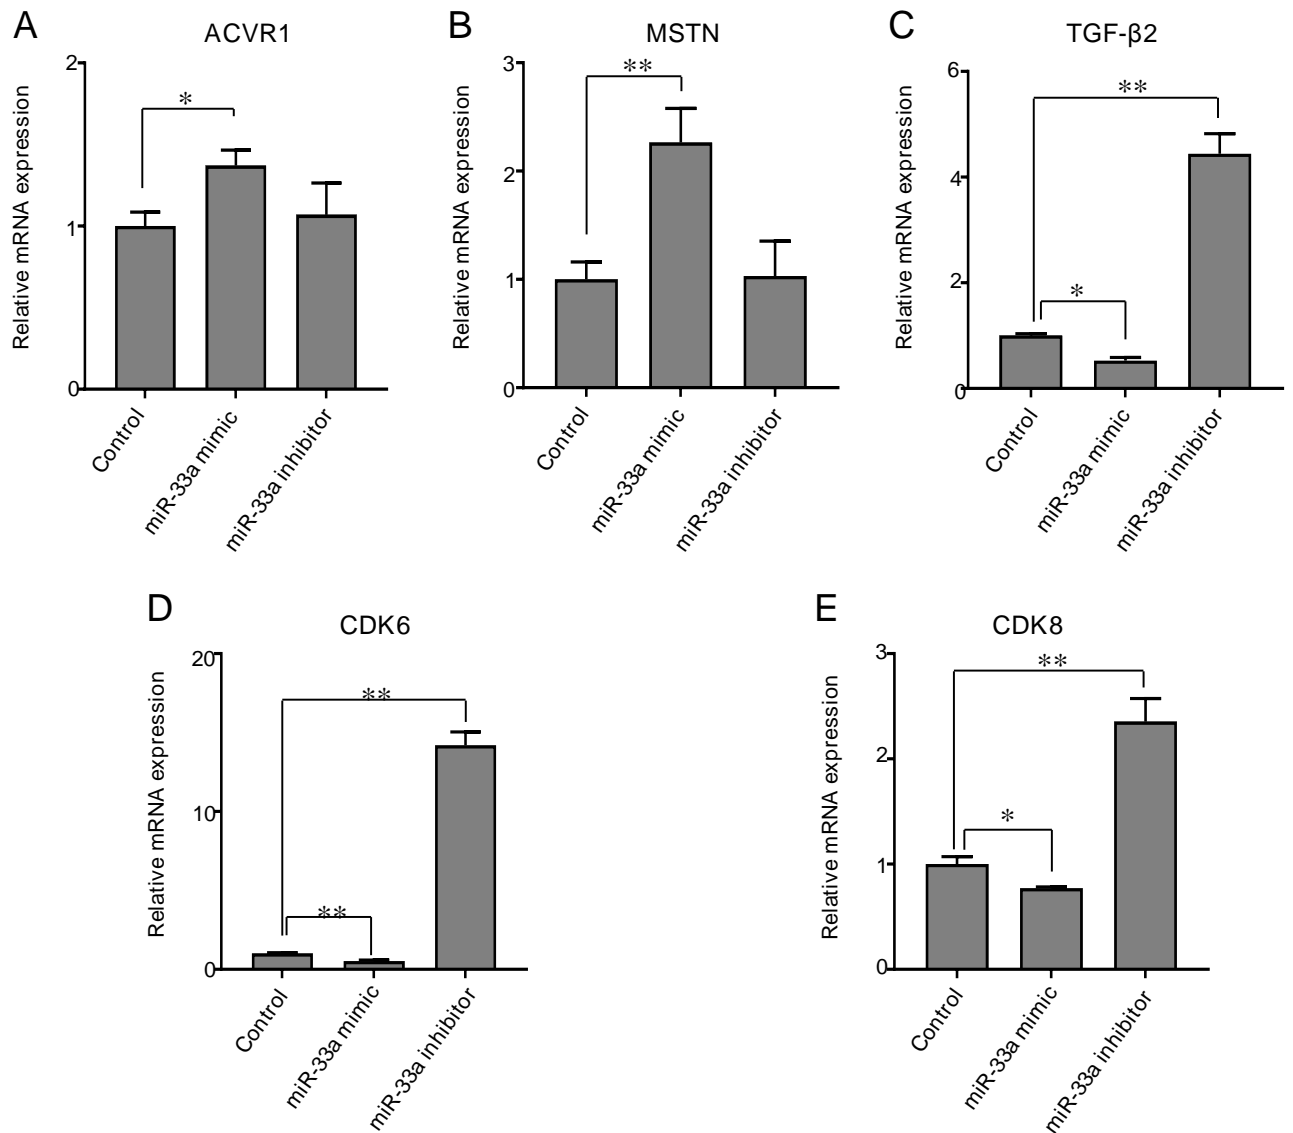

Figure S3. miR-33a inhibits the downstream signaling of FST and CCND1. (A-E). Quantitative RT-PCR analysis of *ACVR1*, *MSTN*, *TGFβ2*, *CDK6* and *CDK8* expression in myoblasts after transfection with miR-33a mimics and inhibitors for 24 hrs. Data were analyzed by the Student's *t* test and shown as mean ± SEM. *N* = 3; \*\* = *P* < 0.01, \* = *P* < 0.05.

Supplemental Figure 4

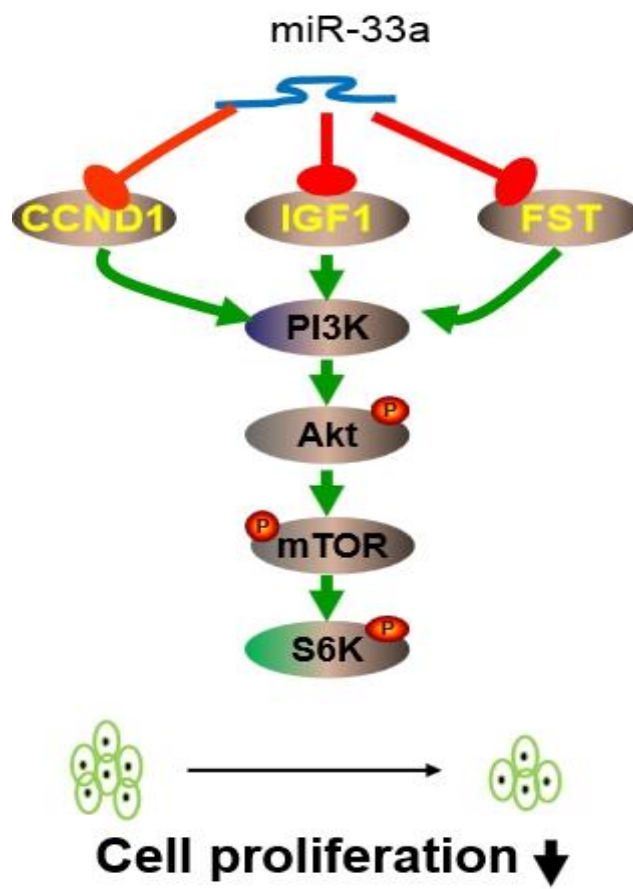

Figure S4. miR-33a regulating myoblast proliferation through PI3K/Akt/mTOR signaling pathway.

## Supplemental table 1

### Real-time PCR primers

| Target gene    | Forward Primer                 | Reverse Primer                 |
|----------------|--------------------------------|--------------------------------|
| FST            | 5'-ACAACCTACCCAAGCGAGTGTG-3'   | 5'-CATCTTCCTCTTCTTCCTCTGG-3'   |
| CCND1          | 5'-TGGATGCCAACCTCCTCAAC-3'     | 5'-ACTTCTGCTCCTCGCAAACCT-3'    |
| PI3K           | 5'-CTTTTACCGAGGAGGTTCTGTGG-3'  | 5'-CTGAAGGTTGGTCTTTGTGGAC-3'   |
| Akt            | 5'-TCTTTGCTGGCATTGTTTGGC-3'    | 5'-GCTGTCATCTTGGTCAGGAGGAGT-3' |
| mTOR           | 5'-CTATCTGCCTCAGCTCATTCT-3'    | 5'-GTCATCCAGGTTAGCTCCAAAG-3'   |
| S6K            | 5'-ATAATCGTGCTGTGGACTGGTG-3'   | 5'-TCTGGCTTCTTGTGTGAGGTAGG-3'  |
| MSTN           | 5'- GCACTGGTATTTGGCAGAGTATT-3' | 5'-TCACCTGGTCCTGGGAAAGT-3'     |
| ACVR1          | 5'-GGTTATGCACTCCCAAAGCAC-3'    | 5'-TGTAAGAGTCGAAGCAGTCAGC-3'   |
| TGFβ-2         | 5'-GAAAGCCAACCACAGAGCCG-3'     | 5'-CCATCGCCGAGACATCAAATC-3'    |
| CDK6           | 5'-TGCATCGGGACCTGAAACC-3'      | 5'-CAACCACTGAGGTAAGAGCCATC-3'  |
| CDK8           | 5'-GCAGGGCAATAACCATACTAACG-3'  | 5'-TTGGAACGCTGATAGTCTGAGGT-3'  |
| <i>β-actin</i> | 5'-GCTATGTCGCCCTGGATTTTC-3'    | 5'- CACAGGACTCCATACCCAAGAA-3'  |
| <i>GAPDH</i>   | 5'-AAGGCTGAGAATGGGAAAC-3'      | 5'-TTCAGGGACTTGTCACTTTC-3'     |

## Supplemental table 2

### Primers for the 3'UTR amplification

| Target gene | Forward Primer                        | Reverse Primer                  |
|-------------|---------------------------------------|---------------------------------|
| FST 3'UTR   | 5'-ATCTGCCAATAAACCTGAGCC-3'           | 5'-GAAAGCTGTAGTCCTGGTCTTCATC-3' |
| CCND1 3'UTR | 5'-ACATATAGGACACATAGTTTAAGGATTT TC-3' | 5'-ACAATCAACACCTTAGCGGCAG-3'    |
| IGF1 3'UTR  | 5'-TAGAGGGAACACAGGAAACAGAAAC-3'       | 5'-CTCCAGCAGCCAGTGTTTCATAG-3'   |

## Supplementary Information

### Supplementary Materials and Methods

#### *Purification of RNA Using Trizol*

1. Add 1 mL of Trizol per  $1 \times 10^6$  duck myoblasts, and then dissolve the cells as quickly as possible in Trizol, solubilize the samples for 5 min at room temperature;
2. Add 0.2 mL of chloroform, mix vigorously by hand for 15 sec. Then the mixture stands for 5 min at room temperature;
3. Centrifuge at 12,000g in a centrifuge for 15 min at 4°C; transfer the upper clear phase to a fresh tube;
4. Add 0.5 mL of isopropanol of the clear phase; mix vigorously and let stand for 15 min at room temperature;
5. Centrifugation at 12,000g in a centrifuge for 10 min at 4°C to collect the precipitated RNA; then carefully remove any remaining liquid of the tube;
6. Added 1 mL 75% ethanol into the tube, then centrifugation at 8,000g in a centrifuge for 5 min at 4°C;
7. Carefully remove any remaining liquid of the tube, resuspend the RNA in RNase-free H<sub>2</sub>O, and store at -20°C.
